# Supplementary material
Source: publisher figshare collection journal article supplement (https://sage.figshare.com/ndownloader/files/18667217)
Supplement: Supplementary file 1 [file 18667217]

**Appendix – Supplemental material for “Shifting public engagement: How media coverage of climate change conferences affects climate change audience segments”**

Description: Supplemental material, Appendix, for “Shifting public engagement: How media coverage of climate change conferences affects climate change audience segments”

Table A1: Survey items, descriptives, and reliability of measured concepts

|                                                                                                                                                                                                                                                                                                                                                                                                                               | Wave 1 |      |      | Wave 2 |      |      |
|-------------------------------------------------------------------------------------------------------------------------------------------------------------------------------------------------------------------------------------------------------------------------------------------------------------------------------------------------------------------------------------------------------------------------------|--------|------|------|--------|------|------|
|                                                                                                                                                                                                                                                                                                                                                                                                                               | Alpha  | M    | SD   | Alpha  | M    | SD   |
| <b>Issue beliefs</b>                                                                                                                                                                                                                                                                                                                                                                                                          |        |      |      |        |      |      |
| <b>Climate change belief</b> (Maibach et al., 2011; Metag et al., 2017)<br>Please indicate how convinced you are that climate change is actually occurring.                                                                                                                                                                                                                                                                   |        | 5.07 | 1.38 |        | 5.01 | 1.44 |
| <b>Climate change skepticism</b> (adapted from Arlt et al., 2011; Hart and Nisbet, 2012)<br>It is not at all clear that climate change actually exists.<br>Climate change is not as dangerous as we are told.<br>Concern about global climate change is unwarranted and no action is needed.                                                                                                                                  | 0.898  | 2.97 | 1.34 | 0.896  | 3.01 | 1.37 |
| <b>Perceived threat</b><br>How likely or unlikely is it, according to you, that ...<br>... severe natural disasters will occur more frequently as a consequence of climate change?<br>... climate change will result in a situation in the future that is out of control?<br>... climate change will get worse in the next years and decades?<br>... there will be severe economic damage as a consequence of climate change? | 0.911  | 4.94 | 1.13 | 0.911  | 4.84 | 1.18 |
| <b>Internal political efficacy</b> (adapted from Hart and Feldman, 2016; Maibach et al., 2011)<br>I feel that I have a pretty good understanding of the issue of climate change.<br>I think that I am better informed about the topic of climate change than most people.<br>I feel I have enough information to help a friend form an opinion about the issue of climate change.                                             | 0.845  | 3.88 | 1.15 | 0.859  | 3.54 | 1.17 |

|                                                                                                                                                                                                                                                                                                                                                                                                                                                                                                                                                                                                                                                   | Wave 1     |      |      | Wave 2     |      |      |
|---------------------------------------------------------------------------------------------------------------------------------------------------------------------------------------------------------------------------------------------------------------------------------------------------------------------------------------------------------------------------------------------------------------------------------------------------------------------------------------------------------------------------------------------------------------------------------------------------------------------------------------------------|------------|------|------|------------|------|------|
|                                                                                                                                                                                                                                                                                                                                                                                                                                                                                                                                                                                                                                                   | Alpha      | M    | SD   | Alpha      | M    | SD   |
| <b>Perceived Consumer Effectiveness</b> (Ellen et al., 1991)<br>As long as other people do not act in environmentally friendly ways, my environmentally friendly behaviors are useless. (R)<br>There is not much that any one individual can do about the environment. (R)                                                                                                                                                                                                                                                                                                                                                                        | $r = .533$ | 4.28 | 1.32 | $r = .595$ | 4.29 | 1.24 |
| <b>Government efficacy</b> (Arlt et al., 2011)<br>The governments of the world will succeed in stopping climate change                                                                                                                                                                                                                                                                                                                                                                                                                                                                                                                            |            | 3.82 | 1.40 |            | 3.80 | 1.39 |
| <b>Issue involvement</b>                                                                                                                                                                                                                                                                                                                                                                                                                                                                                                                                                                                                                          |            |      |      |            |      |      |
| <b>Issue importance</b> (see Tenscher, 2013; Yang et al., 2014)<br>How interested are you personally in the topic of global climate change?<br>How much attention do you pay to the topic of global climate change in the media?<br>Please indicate how important the issue of climate change is to you personally.                                                                                                                                                                                                                                                                                                                               | 0.846      | 4.39 | 1.20 | 0.848      | 4.29 | 1.24 |
| <b>Attitude strength</b> (see Maibach et al., 2011; Poortinga et al., 2011)<br>Please indicate how strong your opinions are about the issue of climate change.<br>To what extent is your opinion about climate change a reflection of your moral conceptions?<br>To what extent is your opinion about climate change is related to your fundamental beliefs of what is good and bad?<br>To what extent is your opinion about climate change based on your moral beliefs and principles?                                                                                                                                                           | 0.857      | 4.36 | 1.09 | 0.881      | 4.35 | 1.18 |
| <b>Environmental concern</b> (Schuhwerk and Lefkoff-Hagius 1995)<br>I am concerned about the environment.<br>The condition of the environment affects the quality of my life.<br>I am willing to make sacrifices to protect the environment.                                                                                                                                                                                                                                                                                                                                                                                                      | 0.879      | 4.39 | 1.23 | 0.875      | 4.30 | 1.29 |
| <b>Issue-specific knowledge</b> (see Hart et al., 2015)<br>Who is the current Secretary-General of the United Nations (UN)?<br>Who is the current minister of infrastructure and environment?<br>What is the international treaty that commits State Parties to reduce greenhouse gas emissions called?<br>What gas is produced by the burning of fossil fuels?<br>What is the main goal of The United Nations (UN) Climate Change Conference in Paris?<br>What is—according to the United Nations (UN)—the maximum amount of warming the Earth can tolerate compared to pre-industrial levels without tipping over into a new, far hotter phase? |            | 2.48 | 1.52 |            | 2.76 | 1.59 |

|                                                                                                                                                                                                                                                                                                                                                                                                                                                                                                                                                                                                                                                                                                                                                                                  | Wave 1 |      |      | Wave 2 |      |      |
|----------------------------------------------------------------------------------------------------------------------------------------------------------------------------------------------------------------------------------------------------------------------------------------------------------------------------------------------------------------------------------------------------------------------------------------------------------------------------------------------------------------------------------------------------------------------------------------------------------------------------------------------------------------------------------------------------------------------------------------------------------------------------------|--------|------|------|--------|------|------|
|                                                                                                                                                                                                                                                                                                                                                                                                                                                                                                                                                                                                                                                                                                                                                                                  | Alpha  | M    | SD   | Alpha  | M    | SD   |
| <b>Policy preferences</b>                                                                                                                                                                                                                                                                                                                                                                                                                                                                                                                                                                                                                                                                                                                                                        |        |      |      |        |      |      |
| <b>Mitigation responsibility</b> (Hart, 2011; also see Maibach et al., 2011)<br>For each of the following groups, please indicate how much responsibility each has for addressing global climate change:<br>The Dutch government<br>Governments of other countries<br>People like me<br>Companies and industry associations                                                                                                                                                                                                                                                                                                                                                                                                                                                      | 0.906  | 5.48 | 1.13 | 0.919  | 5.39 | 1.19 |
| <b>Mitigation support</b> (adapted from Hart et al., 2011; Maibach et al., 2011)<br>The government should take immediate action to protect the country from the impacts of climate change.<br>The government should limit the amount of greenhouse gases that power plants are allowed to release into the air.                                                                                                                                                                                                                                                                                                                                                                                                                                                                  | r=.699 | 5.10 | 1.16 | r=.752 | 5.05 | 1.22 |
| <b>Confidence in science and technology</b> (see Maibach et al., 2011)<br>Most environmental problems can be solved by applying more and better technology. Modern science and new technologies will NOT be able to solve our environmental problems. (R)<br>We cannot keep counting on science to solve our environmental problems. (R)<br>Science and technology will eventually solve our environmental problems.                                                                                                                                                                                                                                                                                                                                                             | 0.589  | 4.28 | 0.90 | 0.551  | 4.32 | 0.89 |
| <b>Behaviors</b>                                                                                                                                                                                                                                                                                                                                                                                                                                                                                                                                                                                                                                                                                                                                                                 |        |      |      |        |      |      |
| <b>Private behaviors</b> (Arlt et al., 2011; Hart 2011; Maibach et al., 2011; Milfont and Duckitt, 2010)<br>I am willing to pay more for my electricity every month if that would contribute to cleaner air.<br>I am willing to stop buying products from environmentally polluting companies even if that is inconvenient for me.<br>I am willing to make personal sacrifices to curtail environmental pollution even if the results are not directly visible.<br>I am willing to travel less by plane to protect the environment.<br>I am willing to drive considerably less by car to protect the climate.<br>I am willing to heat less at home to protect the climate.<br>I am willing to pay more taxes so that the government can do more against environmental pollution. | 0.86   | 4.42 | 1.23 | 0.87   | 4.35 | 1.22 |

|                                                                                                                                 | Wave 1 |      |      | Wave 2 |      |      |
|---------------------------------------------------------------------------------------------------------------------------------|--------|------|------|--------|------|------|
|                                                                                                                                 | Alpha  | M    | SD   | Alpha  | M    | SD   |
| I am willing to sign a petition supporting a goal to protect the environment.                                                   |        |      |      |        |      |      |
| I am willing to become a member of an organization that actively campaigns for a better environment.                            |        |      |      |        |      |      |
| I am willing to participate in a demonstration regarding the issue of climate change.                                           |        |      |      |        |      |      |
| I would like to be part of an environmental movement and take an active role in this.                                           |        |      |      |        |      |      |
| <b>Opinion leadership</b>                                                                                                       | 0.883  | 3.76 | 1.59 | 0.869  | 3.69 | 1.50 |
| I am willing to share information about climate change with others via, for instance, social media, email, posters, and flyers. |        |      |      |        |      |      |
| I am planning to talk about climate change with friends, family and/or colleagues.                                              |        |      |      |        |      |      |
| I am planning to seek more information about the topic of climate change.                                                       |        |      |      |        |      |      |

**References (Table A1)**

Arlt D, Hoppe I and Wolling J (2011) Climate change and media usage: Effects on problem awareness and behavioural intentions. *International Communication Gazette* 73(1-2): 45–63. DOI: 10.1177/1748048510386741.

Ellen PS, Wiener JL and Cobb-Walgren C (1991) The role of perceived consumer effectiveness in motivating environmentally conscious behaviors. *Journal of Public Policy & Marketing* 10(2): 102–117. Available at: <http://www.jstor.org/stable/30000238>.

Hart PS (2011) One or many? The influence of episodic and thematic climate change frames on policy preferences and individual behavior change. *Science Communication* 33(1): 28–51. DOI: 10.1177/1075547010366400.

Hart PS and Feldman L (2016) The influence of climate change efficacy messages and efficacy beliefs on intended political participation. *PLoS ONE* 11(8): e0157658. DOI: 10.1371/journal.pone.0157658.

Hart PS and Nisbet EC (2012) Boomerang effects in science communication: How motivated reasoning and identity cues amplify opinion polarization about climate mitigation policies. *Communication Research* 39(6): 701–723. DOI: 10.1177/0093650211416646.

Hart PS, Nisbet EC and Shanahan JE (2011) Environmental values and the social amplification of risk: An examination of how environmental values and media use influence predispositions for public engagement in wildlife management decision making. *Society & Natural Resources* 24(3): 276–291. DOI: 10.1080/08941920802676464.

Hart PS, Nisbet EC and Myers TA (2015) Public attention to science and political news and support for climate change mitigation. *Nature Climate Change* 5(6): 541–545. DOI: 10.1038/nclimate2577.

- Maibach EW, Leiserowitz A, Roser-Renouf C, Mertz CK and Akerlof K (2011) *Global Warming's Six Americas screening tools: Survey instruments; instructions for coding and data treatment; and statistical program scripts*. Yale University and George Mason University. Yale Project on Climate Change Communication, New Haven, CT. Available at: <http://climatechangecommunication.org/SixAmericasManual.cfm>.
- Metag J, FÜchslin T and Schäfer MS (2017) Global warming's five Germanys: A typology of Germans' views on climate change and patterns of media use and information. *Public Understanding of Science* 26(4): 434–451. DOI: 10.1177/0963662515592558.
- Milfont TL and Duckitt J (2010) The environmental attitudes inventory: A valid and reliable measure to assess the structure of environmental attitudes. *Journal of Environmental Psychology* 30(1): 80–94. DOI: 10.1016/j.jenvp.2009.09.001.
- Poortinga W, Spence A, Whitmarsh L, et al. (2011) Uncertain climate: An investigation into public scepticism about anthropogenic climate change. *Global Environmental Change* 21(3): 1015–1024. DOI: 10.1016/j.gloenvcha.2011.03.001.
- Schuhwerk ME and Lefkoff-Hagius R (1995) Green or non-green? Does type of appeal matter when advertising a green product? *Journal of Advertising* 24(2): 45–54. DOI: 10.1080/00913367.1995.10673475.
- Tenscher J (2013) Media consumption and regional perceptions of global climate change: Findings from Germany. *Studies in Media and Communication* 1(2): 71–80. DOI: 10.11114/smc.v1i2.202.
- Yang ZJ, Rickard LN, Harrison TM, et al. (2014) Applying the risk information seeking and processing model to examine support for climate change mitigation policy. *Science Communication* 36(3): 296–324. DOI: 10.1177/1075547014525350.

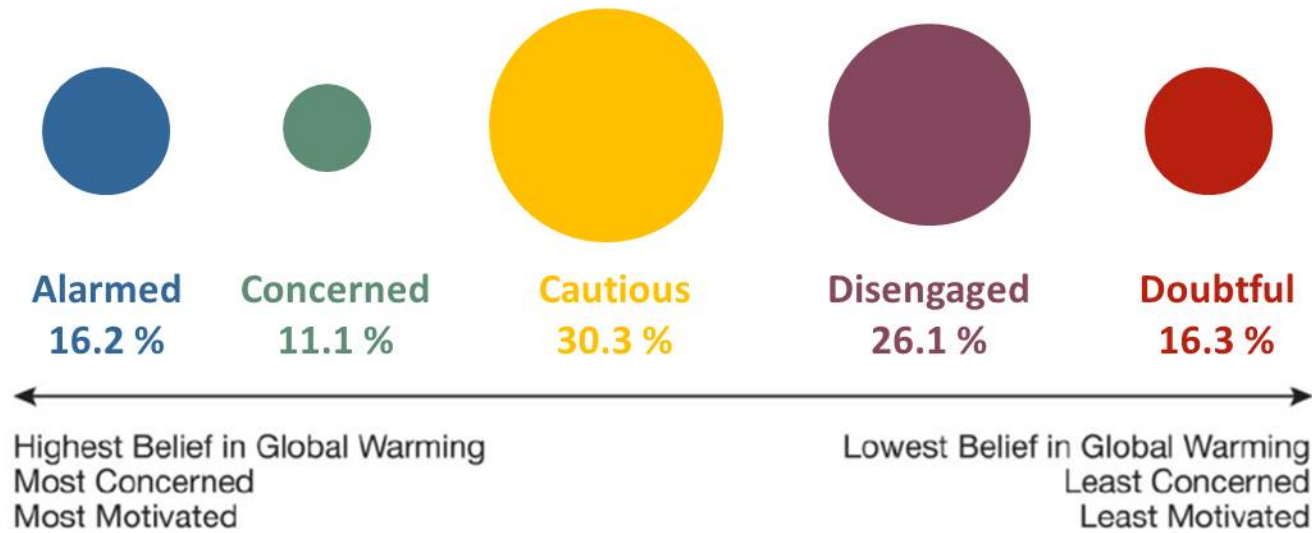

Figure A1: The Dutch climate change audience segments.

The following Tables, A2 and A3, depict the logistic regression models: for positive change the models with the two least engaged segments (doubtful: model 1.1 and 1.2; disengaged: model 2.1 and 2.2) and for negative change the models with the two most engaged segments (alarmed: 3.1 and 3.2; concerned: 4.1 and 4.2) as reference categories are shown.

Table A2: Logistic regression models of positive changes to more engaged segments

| Predictor              | Model 1.1 |                | Model 1.2 |                | Model 2.1 |                | Model 2.2 |                |
|------------------------|-----------|----------------|-----------|----------------|-----------|----------------|-----------|----------------|
|                        | Exp(B)    | 95% CI         |
| Constant               | 0.470     |                | 0.406     |                | 0.254     |                | 0.251     |                |
| Age                    | 1.016*    | (1.001, 1.032) | 1.017*    | (1.001, 1.033) | 1.016*    | (1.001, 1.032) | 1.017*    | (1.001, 1.033) |
| Female                 | 0.964     | (0.651, 1.425) | 0.968     | (0.652, 1.439) | 0.964     | (0.651, 1.427) | 0.968     | (0.651, 1.440) |
| Education              | 1.105     | (0.960, 1.273) | 1.110     | (0.962, 1.280) | 1.105     | (0.959, 1.273) | 1.110     | (0.962, 1.281) |
| Political interest     | 1.042     | (0.912, 1.192) | 1.064     | (0.927, 1.221) | 1.042     | (0.911, 1.192) | 1.064     | (0.927, 1.221) |
| Left-right orientation | 0.903**   | (0.832, 0.980) | 0.903**   | (0.831, 0.982) | 0.903**   | (0.831, 0.980) | 0.903**   | (0.831, 0.982) |
| COP exposure           | 0.972     | (0.937, 1.009) | 0.888*    | (0.800, 0.986) | 0.972     | (0.937, 1.009) | 0.963     | (0.905, 1.024) |
| Concerned              | 0.280**   | (0.130, 0.601) | 0.317**   | (0.143, 0.702) | 0.518     | (0.247, 1.088) | 0.514     | (0.242, 1.092) |
| Cautious               | 0.338*    | (0.203, 0.561) | 0.410**   | (0.237, 0.708) | 0.626     | (0.382, 1.027) | 0.665     | (0.401, 1.102) |
| Disengaged             | 0.539*    | (0.327, 0.889) | 0.617     | (0.357, 1.066) |           |                |           |                |
| Doubtful               |           |                |           |                | 1.854*    | (1.124, 3.058) | 1.622     | (0.937, 2.807) |
| Concerned * exposure   |           |                | 1.097     | (0.973, 1.237) |           |                | 1.011     | (0.927, 1.103) |
| Cautious * exposure    |           |                | 1.173*    | (1.034, 1.330) |           |                | 1.081     | (0.981, 1.192) |
| Disengaged * exposure  |           |                | 1.085     | (0.964, 1.221) |           |                |           |                |
| Doubtful * exposure    |           |                |           |                |           |                | 0.922     | (0.819, 1.038) |
| Nagelkerke R Square    |           | 0.076          |           | 0.090          |           | 0.076          |           | 0.090          |

Note. The Alarmed segment was excluded resulting in  $n = 731$ . The reference category for model 1.1 and 1.2 was the Doubtful segment, for model 2.1 and 2.2 the Disengaged segment. \*  $p < .05$ , \*\*  $p < .01$ , \*\*\*  $p < .001$

Table A3: Logistic regression models of negative changes to less engaged segments

| Predictor              | Model 3.1 |                | Model 3.2 |                | Model 4.1 |                | Model 4.2 |                |
|------------------------|-----------|----------------|-----------|----------------|-----------|----------------|-----------|----------------|
|                        | Exp(B)    | 95% CI         |
| Constant               | 0.738     |                | 0.668     |                | 0.842     |                | 0.934     |                |
| Age                    | 0.982*    | (0.967, 0.997) | 0.981*    | (0.966, 0.996) | 0.982*    | (0.967, 0.997) | 0.981*    | (0.966, 0.996) |
| Female                 | 0.588**   | (0.401, 0.863) | 0.637*    | (0.431, 0.944) | 0.588**   | (0.401, 0.863) | 0.637**   | (0.431, 0.944) |
| Education              | 0.798**   | (0.699, 0.912) | 0.798**   | (0.697, 0.914) | 0.798**   | (0.699, 0.912) | 0.798**   | (0.697, 0.914) |
| Political interest     | 1.025     | (0.891, 1.179) | 1.013     | (0.878, 1.167) | 1.025     | (0.891, 1.179) | 1.013     | (0.878, 1.167) |
| Left-right orientation | 1.019     | (0.946, 1.098) | 1.006     | (0.932, 1.086) | 1.019     | (0.946, 1.098) | 1.006     | (0.932, 1.086) |
| COP exposure           | 0.987     | (0.963, 1.012) | 1.040     | (0.991, 1.092) | 0.987     | (0.963, 1.012) | 0.937*    | (0.888, 0.989) |
| Alarmed                |           |                |           |                | 0.876     | (0.490, 1.567) | 0.715     | (0.392, 1.305) |
| Concerned              | 1.141     | (0.638, 2.041) | 1.398     | (0.766, 2.551) |           |                |           |                |
| Cautious               | 0.676     | (0.416, 1.098) | 0.745     | (0.455, 1.218) | 0.592     | (0.349, 1.004) | 0.533*    | (0.311, 0.914) |
| Disengaged             | 0.118***  | (0.061, 0.227) | 0.124***  | (0.064, 0.242) | 0.103***  | (0.053, 0.200) | 0.089***  | (0.045, 0.174) |
| Alarmed * exposure     |           |                |           |                |           |                | 1.110**   | (1.034, 1.192) |
| Concerned * exposure   |           |                | 0.901**   | (0.839, 0.967) |           |                |           |                |
| Cautious * exposure    |           |                | 0.993     | (0.915, 1.078) |           |                | 1.103*    | (1.012, 1.202) |
| Disengaged * exposure  |           |                | 0.932     | (0.853, 1.017) |           |                | 1.034     | (0.943, 1.134) |
| Nagelkerke R Square    |           | 0.165          |           | 0.189          |           | 0.165          |           | 0.189          |

Note. The Doubtful segment was excluded resulting in  $n = 730$ . The reference category for model 3.1 and 3.2 was the Alarmed segment, for model 4.1 and 4.2 the Concerned segment. \*  $p < .05$ , \*\*  $p < .01$ , \*\*\*  $p < .001$



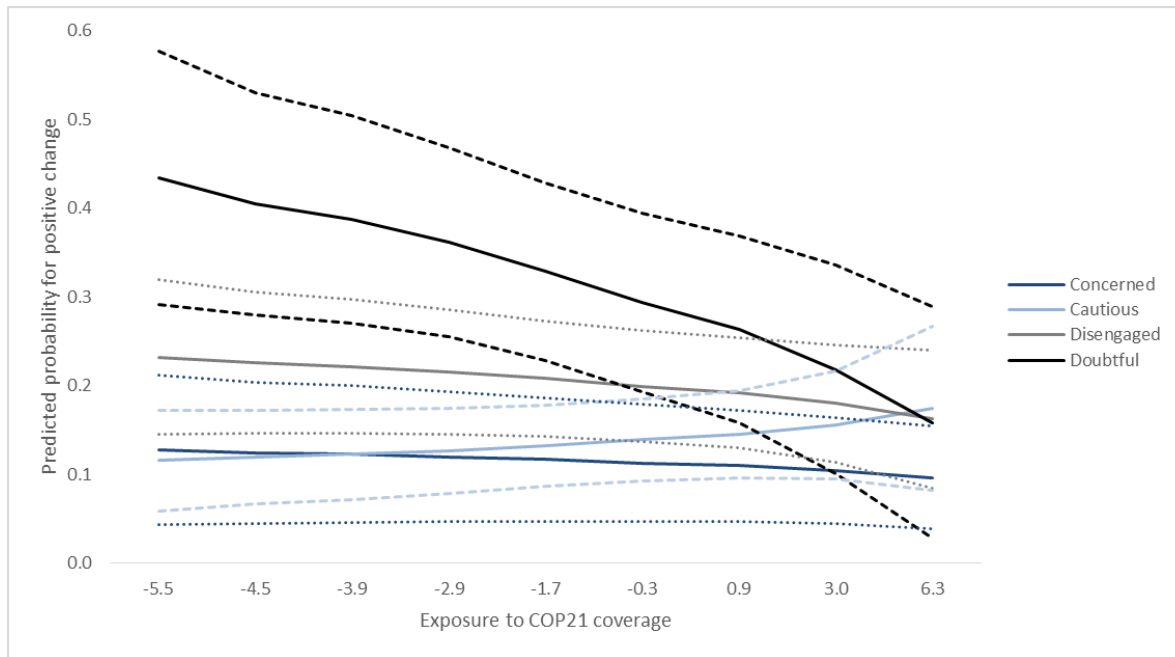

Figure A2: Predicted probabilities and 95% confidence intervals of changes to more engaged segments for different levels of exposure to COP21 coverage per audience segment (based on model 1.2 in Table A2, n = 731, the Alarmed segment excluded).

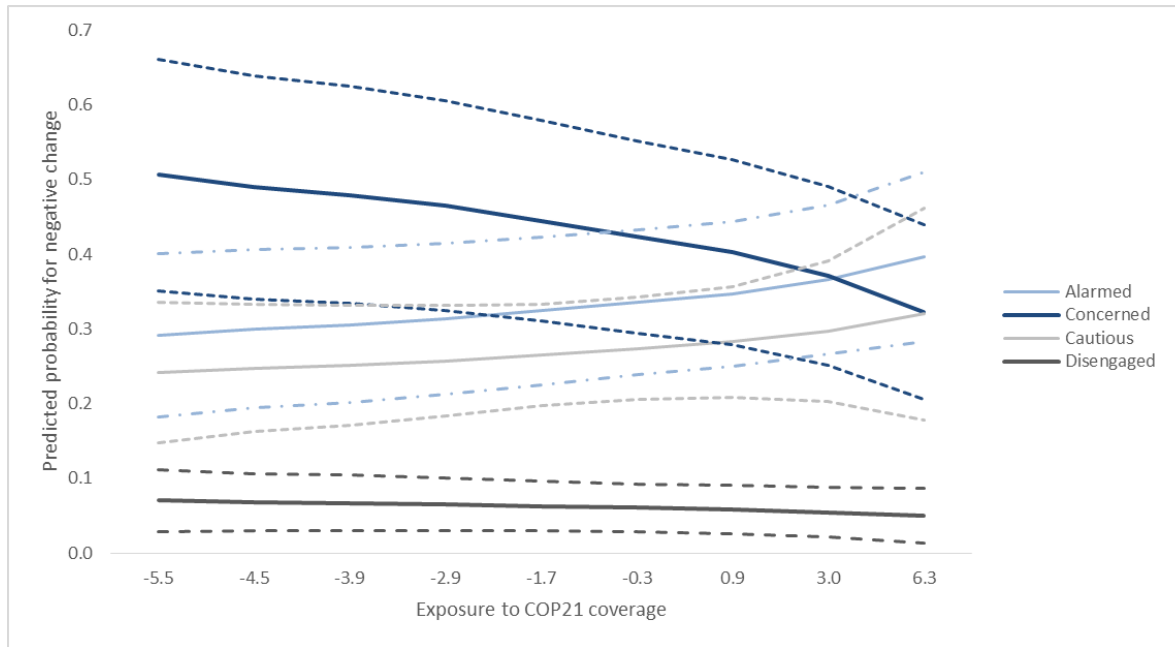

Figure A3: Predicted probabilities and 95% confidence intervals of changes to less engaged segments for different levels of exposure to COP21 coverage per audience segment (based on model 4.2 in Table A3, n = 730, the Doubtful segment excluded).
